# Supplementary material for: Establishment of a Transient Transformation Protocol in Cinnamomum camphora
Source: MDPI journal article supplement (doi:10.3390/f14091872), 2023-09-14
Supplement: s1 [file s1]

Archive with 1 entries (1 files):
- forests-2602644-supplementary.pdf
