# Supplementary material for: Establishment of a Transient Transformation Protocol in Cinnamomum camphora
Source: MDPI journal article supplement (doi:10.3390/f14091872), 2023-09-14
Supplement: s1 [file s1 › forests-2602644-supplementary.pdf]

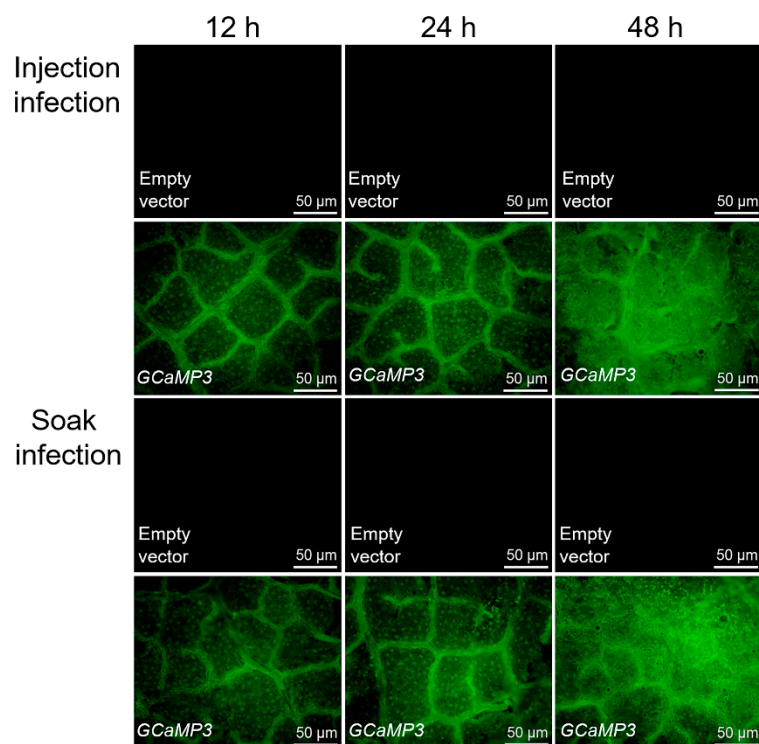

**Figure S1.** Transformation effects of *A. tumefaciens* with empty vector and *GCaMP3* on *C. camphora* during 48 h. When *C. camphora* was infected by *A. tumefaciens* GV3101 with empty vector (growth density OD<sub>600</sub> of 0.5, infection concentration OD<sub>600</sub> of 0.7) by using injection and soak infection methods, no fluorescence was detected during 48-h co-cultivation. However, the fluorescence intensity in *C. camphora* infected by *A. tumefaciens* with *GCaMP3* gradually enhanced with prolonging the co-cultivation time.
